# Supplementary material for: Green and Efficient Determination of Fluoroquinolone Residues in Edible Green Fruits and Leafy Vegetables by Ultrasound-Assisted Extraction Followed by HPLC-MS/MS
Source: MDPI journal article supplement (doi:10.3390/molecules27196595), 2022-10-05
Supplement: s1 [file s1]

# Green and Efficient Determination of Fluoroquinolone Residues in Edible Green Fruits and Leafy Vegetables by Ultrasound-Assisted Extraction Followed by HPLC-MS/MS

Francesca Merlo <sup>1,\*</sup>, Dario Centenaro <sup>2</sup>, Federica Maraschi <sup>1</sup>, Antonella Profumo <sup>1</sup> and Andrea Speltini <sup>1,\*</sup>

<sup>1</sup> Department of Chemistry, University of Pavia, 27100 Pavia, Italy

<sup>2</sup> Department of Drug Sciences, University of Pavia, 27100 Pavia, Italy

\* Correspondence: francesca.merlo@unipv.it (F.M.); andrea.speltini@unipv.it (A.S.);  
Tel.: +39-0382-98-73-50 (A.S.)

**Table S1.** MRM conditions for the HPLC-ESI-MS/MS analysis of FQs.

| Analyte | Precursor Ion (m/z) | Product Ion (m/z) | Fragmentor (V) | Collision Energy (V) | Dwell Time (ms) |
|---------|---------------------|-------------------|----------------|----------------------|-----------------|
| MAR     | 363.0               | 345.1             | 130            | 21                   | 75              |
|         |                     | 320.0             | 130            | 13                   | 75              |
| LEV     | 362.0               | 318.1             | 140            | 21                   | 75              |
|         |                     | 261.0             | 140            | 29                   | 75              |
| NOR     | 320.0               | 302.1             | 130            | 25                   | 75              |
|         |                     | 276.1             | 130            | 17                   | 75              |
| CIP     | 332.1               | 314.1             | 130            | 21                   | 75              |
|         |                     | 231.1             | 130            | 40                   | 75              |
| DAN     | 358.1               | 340.1             | 135            | 25                   | 75              |
|         |                     | 82.1              | 135            | 49                   | 75              |
| ENR     | 360.1               | 342.1             | 130            | 25                   | 75              |
|         |                     | 316.1             | 130            | 21                   | 75              |
| ORB     | 396.2               | 352.2             | 102            | 25                   | 75              |
|         | 396.2               | 295.0             | 102            | 33                   | 75              |
| ENOX    | 321.1               | 303.1             | 125            | 16                   | 75              |
|         | 321.1               | 232.1             | 125            | 36                   | 75              |

**Table S2.** Calibration curves and correlation coefficients in pure solvent.

| Analyte | Calibration line equation*       | R <sup>2</sup> |
|---------|----------------------------------|----------------|
| MAR     | $y = 1451 (57) x + 1304 (724)$   | 0.9959         |
| NOR     | $y = 2089 (67) x + 1870 (860)$   | 0.9964         |
| LEV     | $y = 4329 (130) x + 3570 (1660)$ | 0.9959         |
| CIP     | $y = 2103 (87) x + 2652 (1110)$  | 0.9932         |
| DAN     | $y = 2404 (144) x + 4280 (1835)$ | 0.9920         |
| ENR     | $y = 2367 (69) x + 1804 (881)$   | 0.9966         |
| ORB     | $y = 4633 (166) x + 1597 (2126)$ | 0.9949         |

\* Calculated as peak areas vs. concentration; in parentheses the uncertainties associated to slope and intercept of the mean calibration curve obtained from Ordinary Linear Lowest Square Regression (OLLSR).

**Table S3.** Calibration curves and correlation coefficients in purified extract from freeze-dried spinach.

| Analyte | Calibration line equation*    | R <sup>2</sup> |
|---------|-------------------------------|----------------|
| MAR     | $y = 431 (7) x + 80 (92)$     | 0.9989         |
| NOR     | $y = 529 (3) x + 349 (40)$    | 0.9993         |
| LEV     | $y = 1262 (16) x + 192 (207)$ | 0.9999         |
| CIP     | $y = 800 (8) x + 57 (96)$     | 0.9996         |
| DAN     | $y = 3166 (35) x + 624 (442)$ | 0.9995         |
| ENR     | $y = 1392 (21) x + 181 (264)$ | 0.9991         |
| ORB     | $y = 558 (6) x + 197 (81)$    | 0.9995         |

\* Calculated as peak areas vs. concentration; in parentheses the uncertainties associated to slope and intercept of the mean calibration curve obtained from Ordinary Linear Lowest Square Regression (OLLSR).

**Table S4.** Calibration curves and correlation coefficients in purified extract from freeze-dried lettuce.

| Analyte | Calibration line equation*      | R <sup>2</sup> |
|---------|---------------------------------|----------------|
| MAR     | $y = 733 (11) x - 38 (92)$      | 0.9992         |
| NOR     | $y = 1003 (21) x + 112 (264)$   | 0.9967         |
| LEV     | $y = 2204 (63) x - 175 (810)$   | 0.9983         |
| CIP     | $y = 3371 (111) x - 417 (1420)$ | 0.9957         |
| DAN     | $y = 7162 (168) x - 529 (2142)$ | 0.9978         |
| ENR     | $y = 2145 (54) x - 376 (683)$   | 0.9975         |
| ORB     | $y = 1327 (47) x - 239 (607)$   | 0.9949         |

\* Calculated as peak areas vs. concentration; in parentheses the uncertainties associated to slope and intercept of the mean calibration curve obtained from Ordinary Linear Lowest Square Regression (OLLSR).

**Table S5.** Calibration curves and correlation coefficients in purified extract from freeze-dried cucumber.

| Analyte | Calibration line equation*       | R <sup>2</sup> |
|---------|----------------------------------|----------------|
| MAR     | $y = 777 (15) x + 201 (195)$     | 0.9985         |
| NOR     | $y = 1155 (40) x + 135 (510)$    | 0.9952         |
| LEV     | $y = 2481 (86) x + 45 (1101)$    | 0.9953         |
| CIP     | $y = 4630 (203) x + 483 (2597)$  | 0.9924         |
| DAN     | $y = 9702 (421) x + 1322 (5381)$ | 0.9925         |
| ENR     | $y = 2592 (79)x + 47 (1009)$     | 0.9963         |
| ORB     | $y = 1762 (67) x - 310 (850)$    | 0.9943         |

\* Calculated as peak areas vs. concentration; in parentheses the uncertainties associated to slope and intercept of the mean calibration curve obtained from Ordinary Linear Lowest Square Regression (OLLSR).

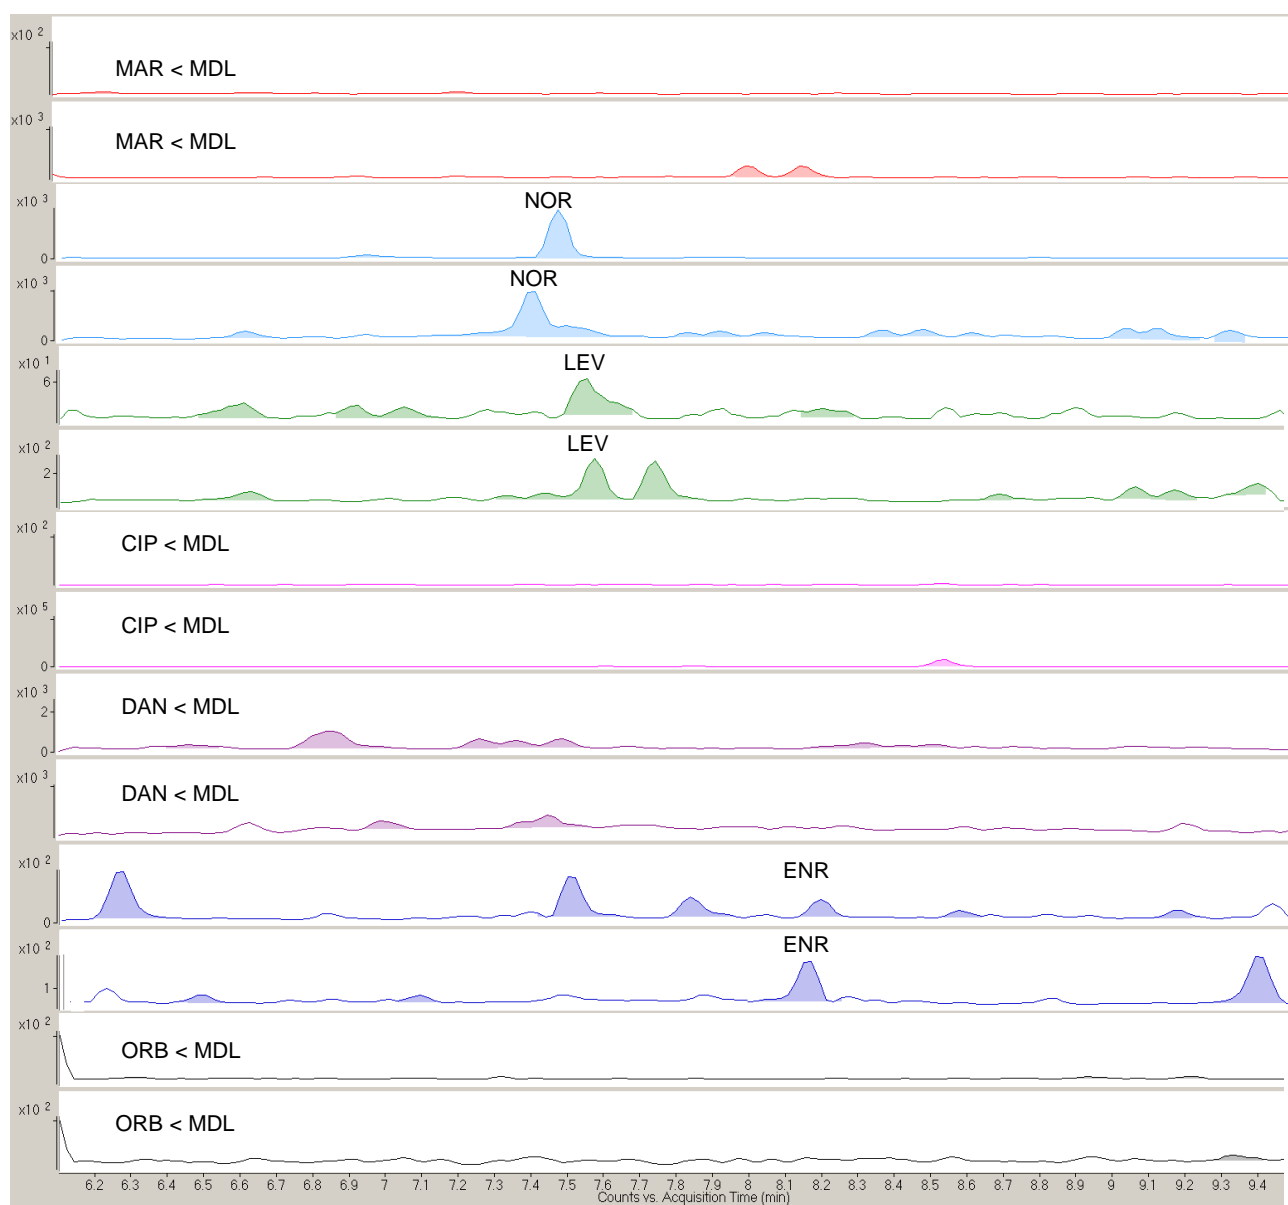

**Figure S1.** MRM chromatogram (in the time range 6–9.5 min) of purified extract from freeze-dried sample of commercial cucumber (NOR quantified at 130 ng g<sup>-1</sup>, LEV at 4 ng g<sup>-1</sup> and ENR at 5 ng g<sup>-1</sup>).

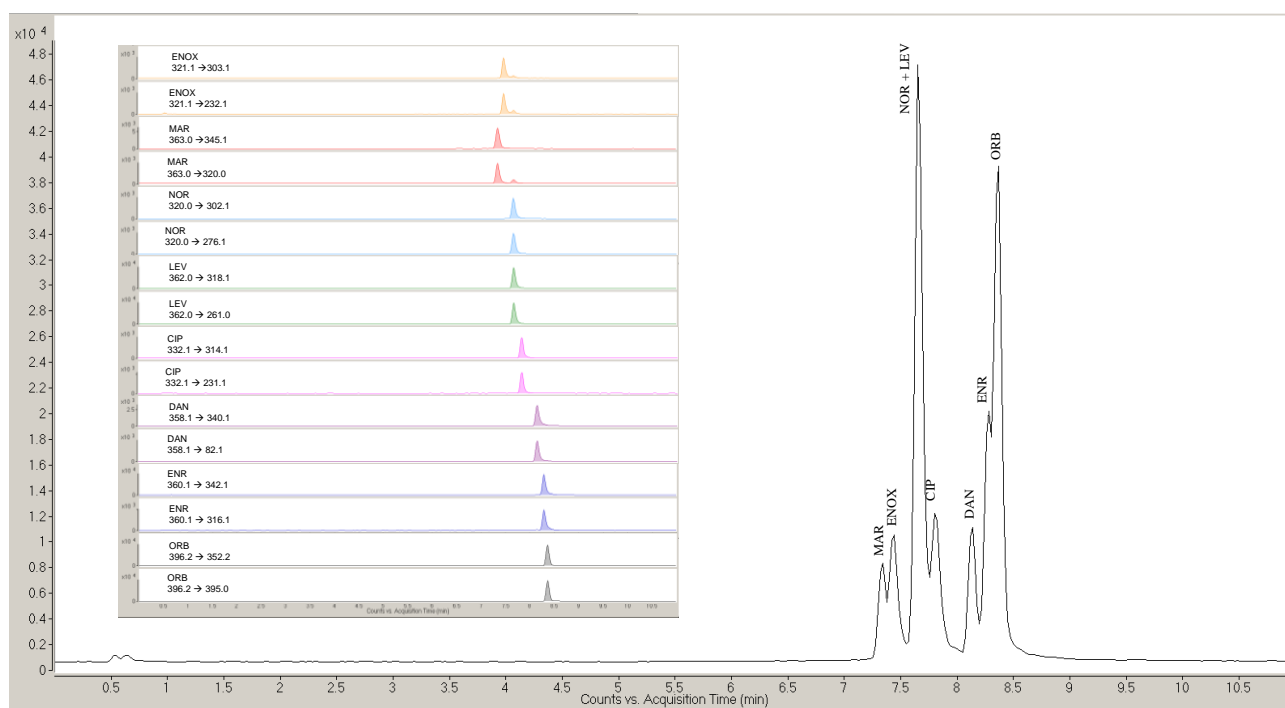

**Figure S2.** TIC and MRM chromatograms from a FQs standard mixture in 0.1% HCOOH-ACN, 80:20 *v/v* (25 ng mL<sup>-1</sup> of each analyte).
